# Supplementary material
Source: publisher figshare collection journal article supplement (https://karger.figshare.com/articles/dataset/_/5120977)
Supplement: Supplementary file 1 [file 1]

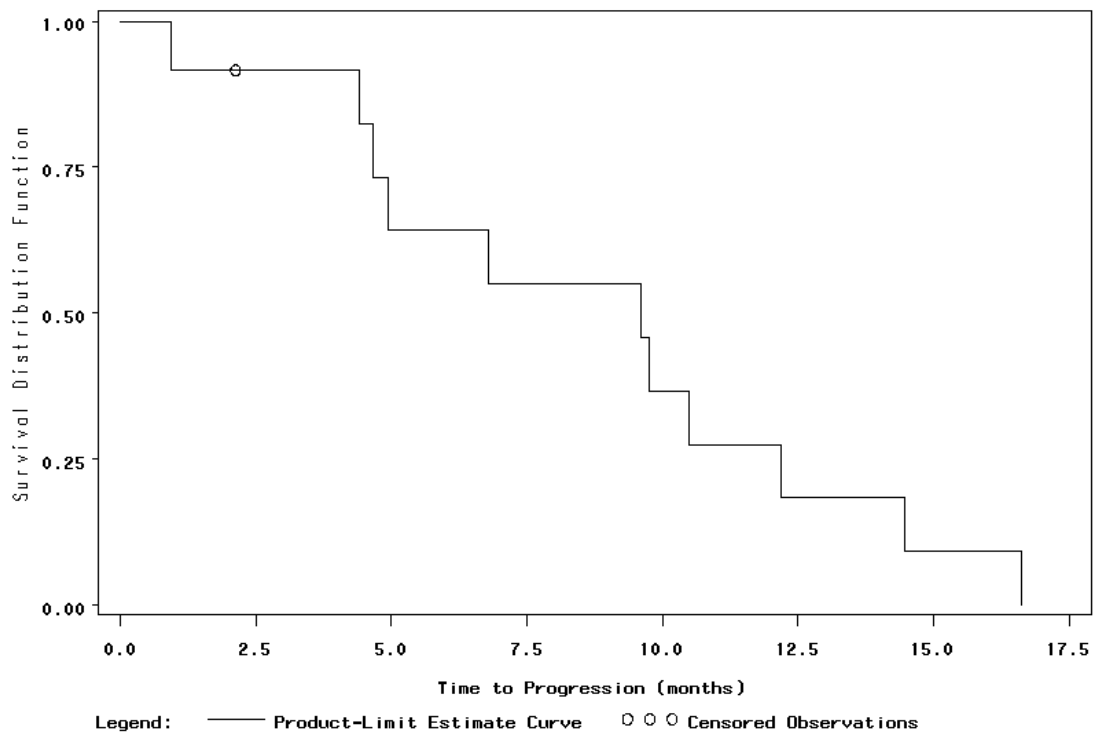

**Fig. 1.** Kaplan-Meier progression-free survival curve.

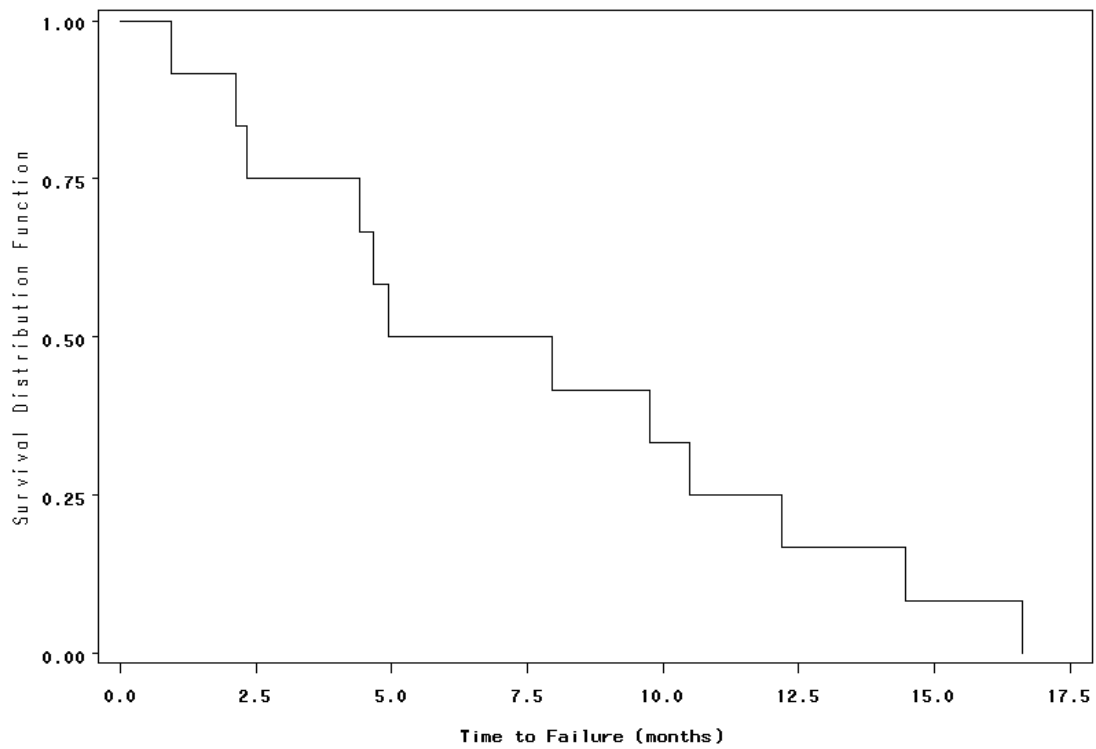

**Fig. 2.** Kaplan-Meier failure-free survival curve.

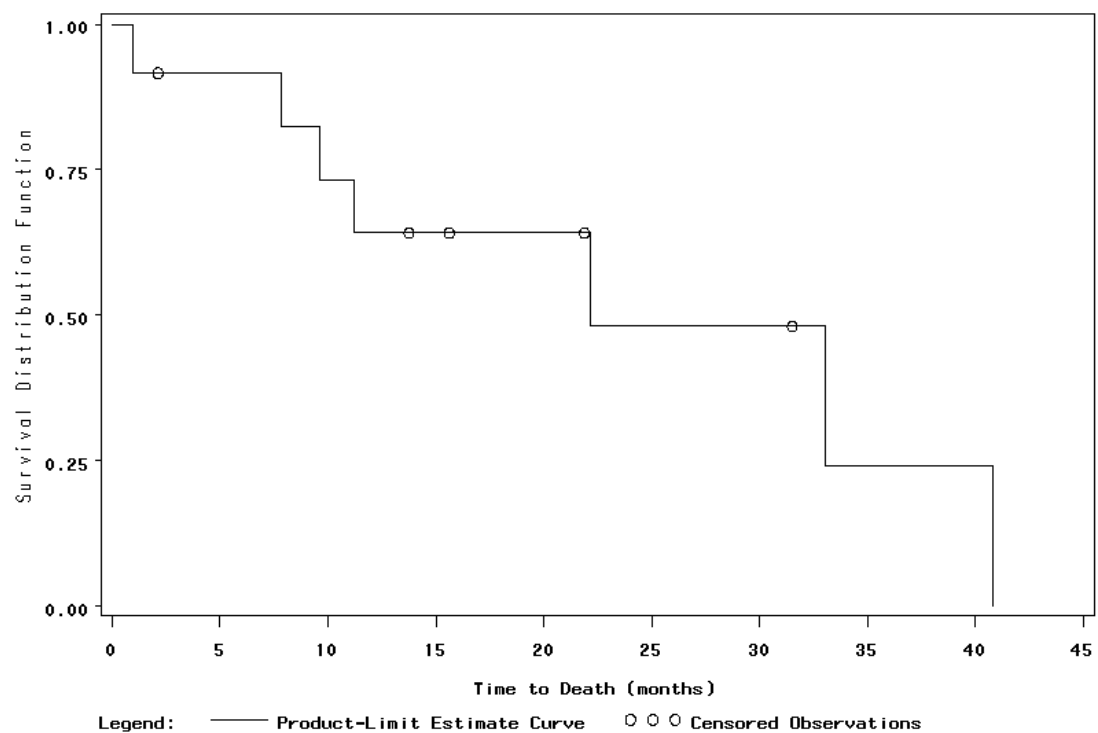

**Fig. 3.** Kaplan-Meier overall survival curve.

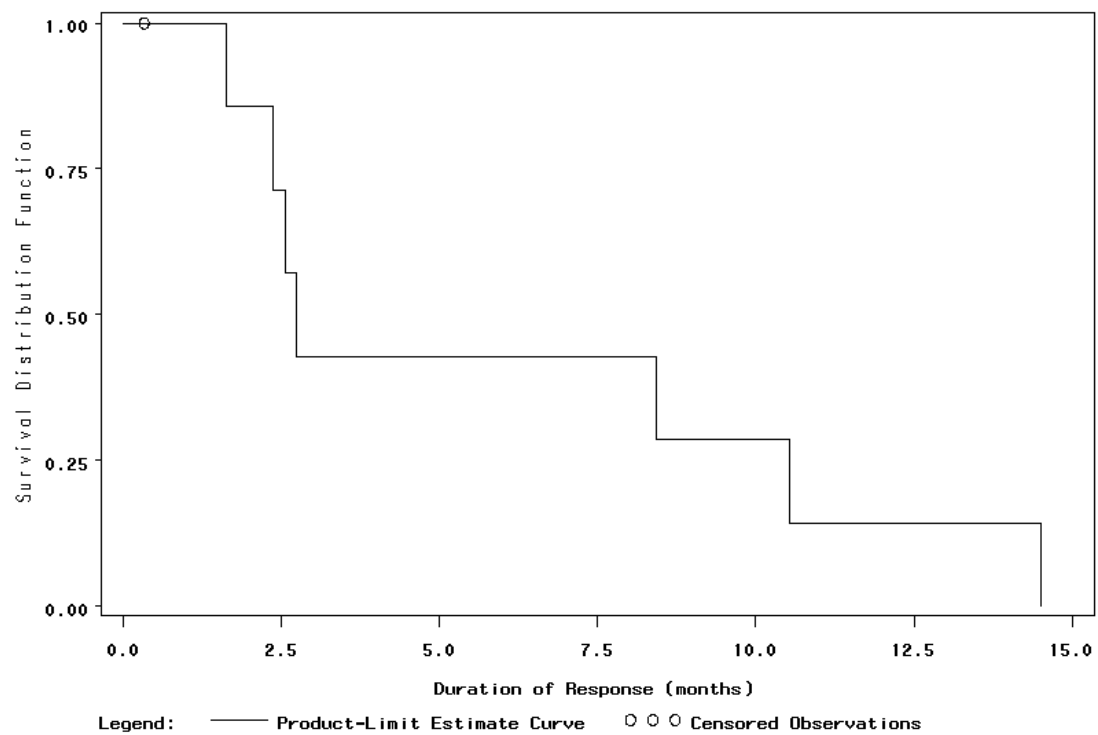

**Fig. 4.** Kaplan-Meier response duration curve.
